# Supplementary material for: A Deep U-Net-ConvLSTM Framework with Hydrodynamic Model for Basin-Scale Hydrodynamic Prediction
Source: MDPI journal article supplement (doi:10.3390/w16050625), 2024-02-20
Supplement: s1 [file s1]

Archive with 1 entries (1 files):
- water-2844631-supplementary.pdf
