# Supplementary material for: A Deep U-Net-ConvLSTM Framework with Hydrodynamic Model for Basin-Scale Hydrodynamic Prediction
Source: MDPI journal article supplement (doi:10.3390/w16050625), 2024-02-20
Supplement: s1 [file s1 › water-2844631-supplementary.pdf]

# Supplementary materials: A Deep U-Net-ConvLSTM Framework with Hydrodynamic Model for Basin-Scale Hydrodynamic Prediction

Ao Li <sup>1</sup>, Wanshun Zhang <sup>1,2,3,\*</sup>, Xiao Zhang <sup>1</sup>, Gang Chen <sup>1</sup>, Xin Liu <sup>1</sup>, Anna Jiang <sup>1</sup>, Feng Zhou <sup>1</sup> and Hong Peng <sup>4</sup>

1 School of Resource and Environmental Sciences, Wuhan University, Wuhan 430079, China

2 China Institute of Development Strategy and Planning, Wuhan University, Wuhan 430079, China

3 School of Water Resources and Hydropower Engineering, State Key Laboratory of Water Resources and Hydropower Engineering Science, Wuhan University, Wuhan 430072, China

4 School of Water Resources and Hydropower Engineering, Wuhan University, Wuhan 430072, China

\* Correspondence: wszhang@whu.edu.cn

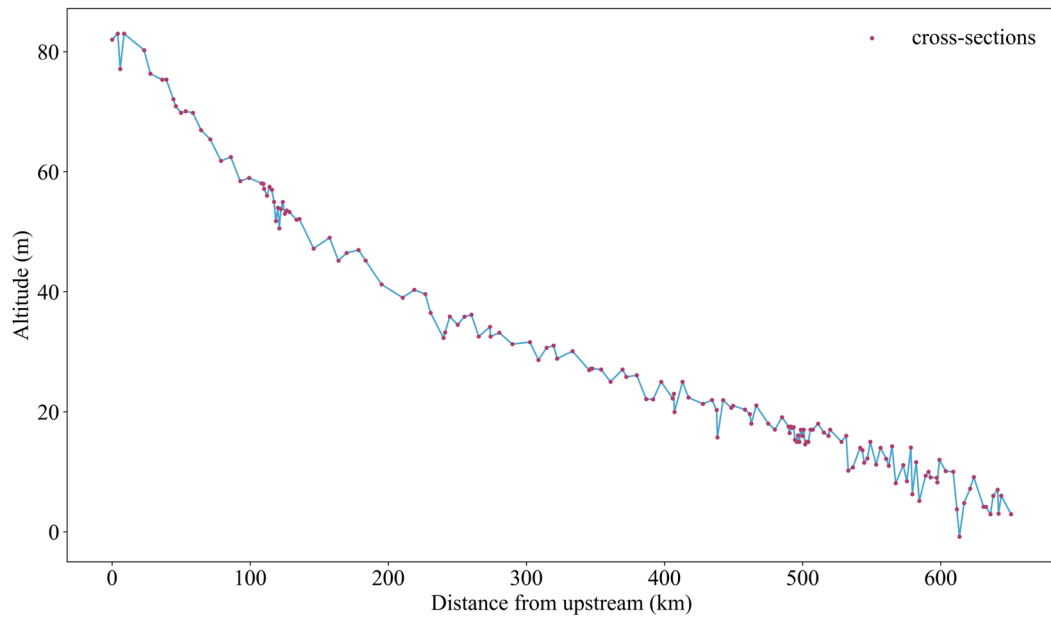

**Figure S1.** The thalweg of river in the middle and lower reaches of the Han River (Danjiangkou Reservoir as the upstream starting point).

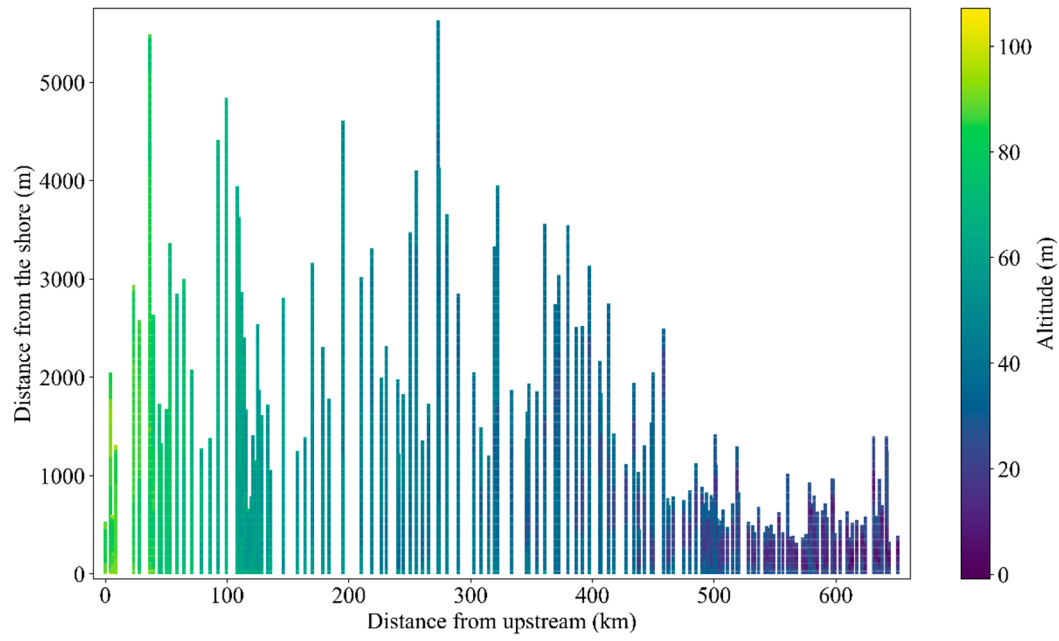

**Figure S2.** Schematic distribution of channel section elevations in the middle and lower reaches of the Han River.

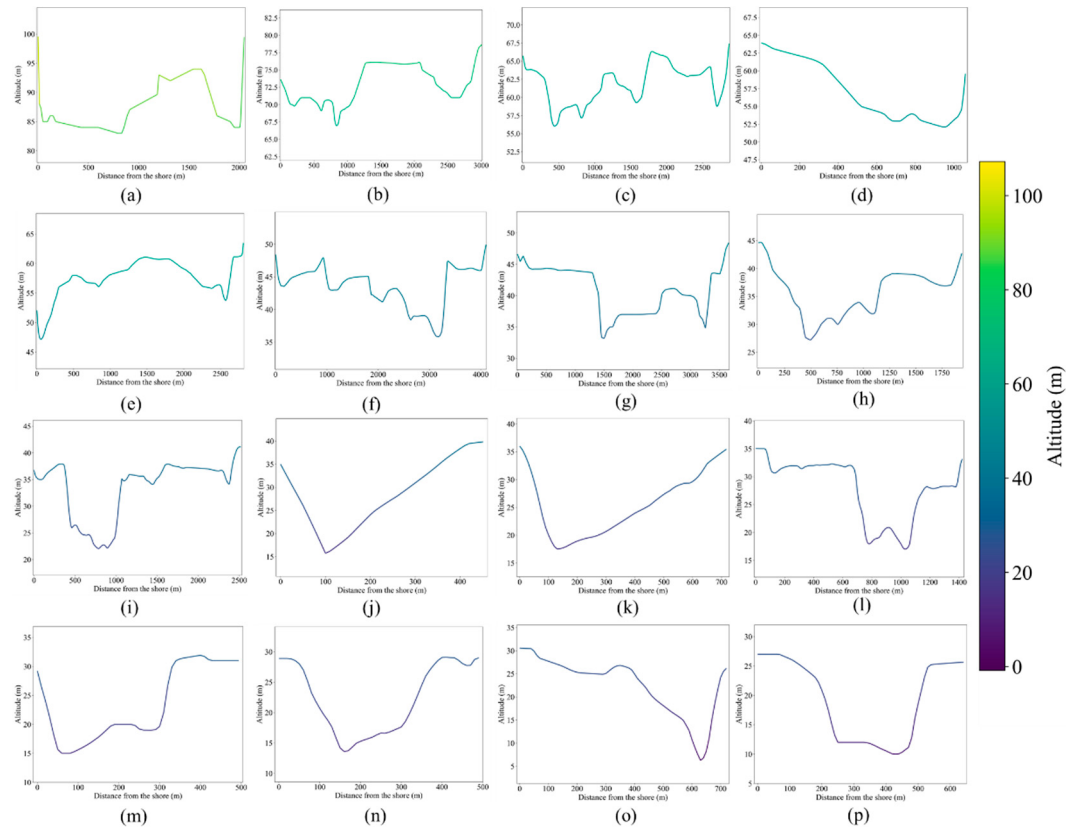

**Figure S3.** Elevation dispersion in certain cross-sections of the middle and lower stretches of the Hanjiang River (a) 2 (b) 14 (c) 23 (d) 36 (e) 37 (f) 52 (g) 57 (h) 67 (i) 74 (j) 84 (k) 97 (l) 106 (m) 109 (n) 121 (o) 134 (p) 144 (cross-sections numbering, starting at 1 and increasing from upstream to downstream)

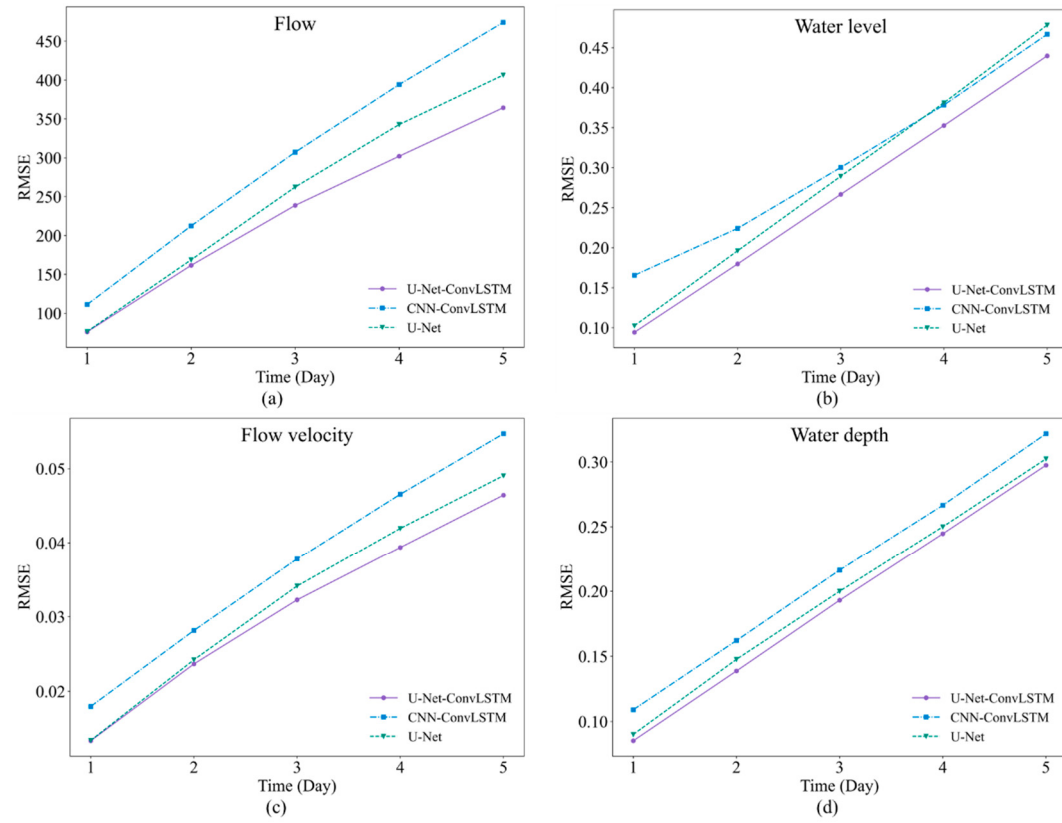

**Figure S4.** Trend of RMSE of U-Net-ConvLSTM, CNN-ConvLSTM and U-Net with prediction span in multi-step-ahead forecasting mode (a) Flow (b) Water level (c) Flow velocity (d) Water depth.
